# Supplementary material for: Monitoring the 5′UTR landscape reveals isoform switches to drive translational efficiencies in cancer
Source: PubMed Central journal article supplement (PMC9957725; doi:10.1038/s41388-022-02578-2), 2022-12-23

# Supplementary Figure 1

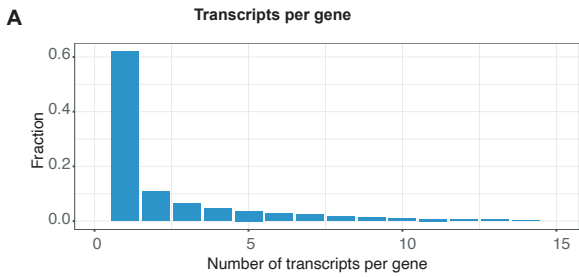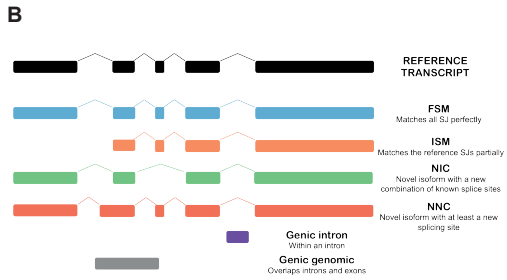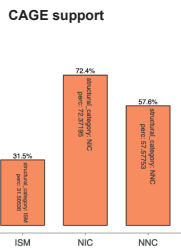

## Alternative splicing event definitions in SplAdder

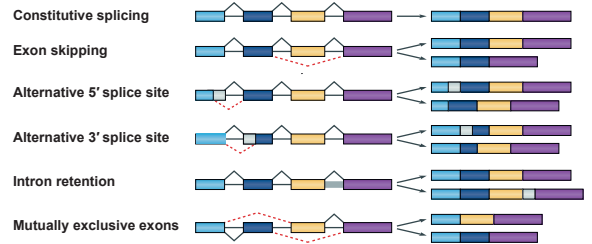

## SQANTI3 report

### Features of bad quality

Quality Control Attributes Across Structural Categories

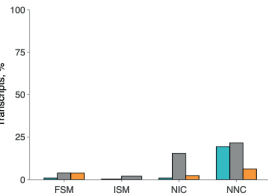

### Features of good quality

All Canonical Junctions

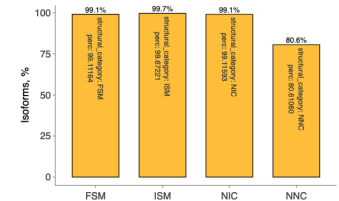

## SQANTI transcripts

| Gene Classification | Genes, count | Transcript Classification | Isoforms, count |
|---------------------|--------------|---------------------------|-----------------|
| Annotated Genes     | 24022        | FSM                       | 41311           |
| Novel Genes         | 26680        | ISM                       | 10079           |
|                     |              | NIC                       | 30369           |
|                     |              | NNC                       | 29119           |
|                     |              | Genic                     | 5913            |
|                     |              | Genic Antisense           | 9243            |
|                     |              | Fusion                    | 891             |
|                     |              | Intergenic                | 21252           |
|                     |              | Genic Intron              | 1257            |

## SQANTI transcripts after CAGE filtering

| Gene Classification | Genes, count | Transcript Classification | Isoforms, count |
|---------------------|--------------|---------------------------|-----------------|
| Annotated Genes     | 14017        | FSM                       | 25235           |
| Novel Genes         | 3152         | ISM                       | 3781            |
|                     |              | NIC                       | 22995           |
|                     |              | NNC                       | 19878           |
|                     |              | Genic                     | 1041            |
|                     |              | Genic Antisense           | 856             |
|                     |              | Fusion                    | 549             |
|                     |              | Intergenic                | 2131            |
|                     |              | Genic Intron              | 551             |

## C GO terms for significant alternative splicing events in EpSC

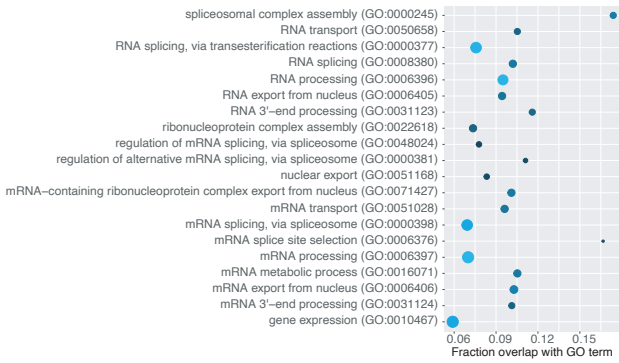

## D Significant alternative splicing events in SCC

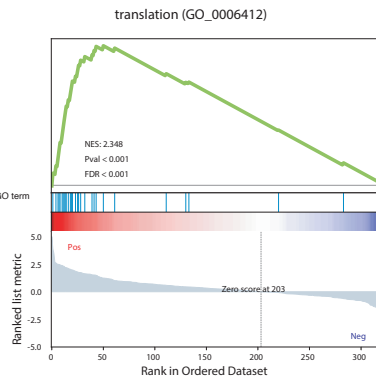

## E Short-read transcript changes in SCC vs. WT

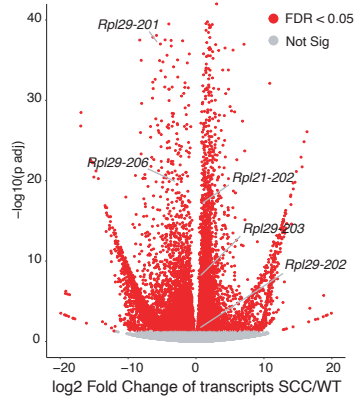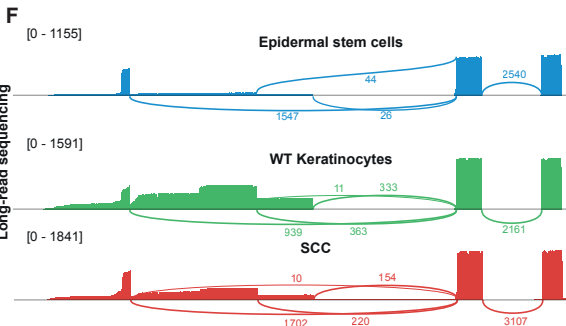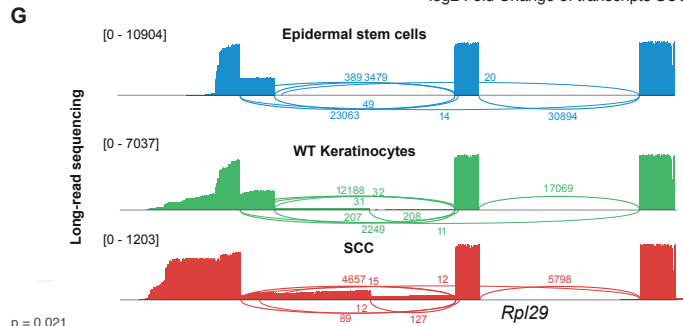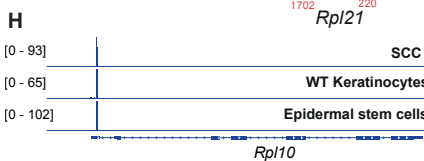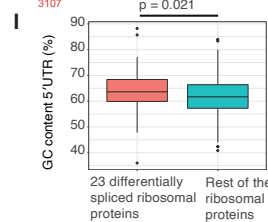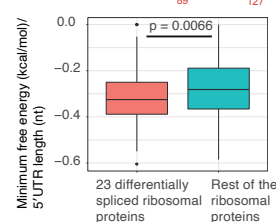

# Supplementary Figure 2

**A**

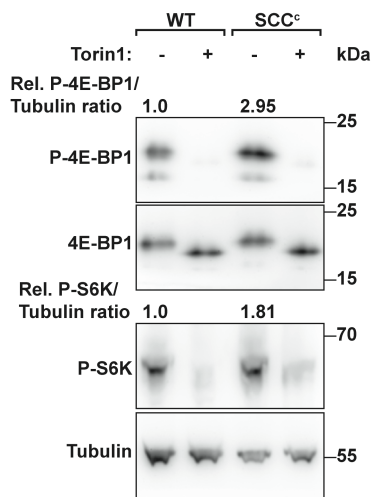

**B**

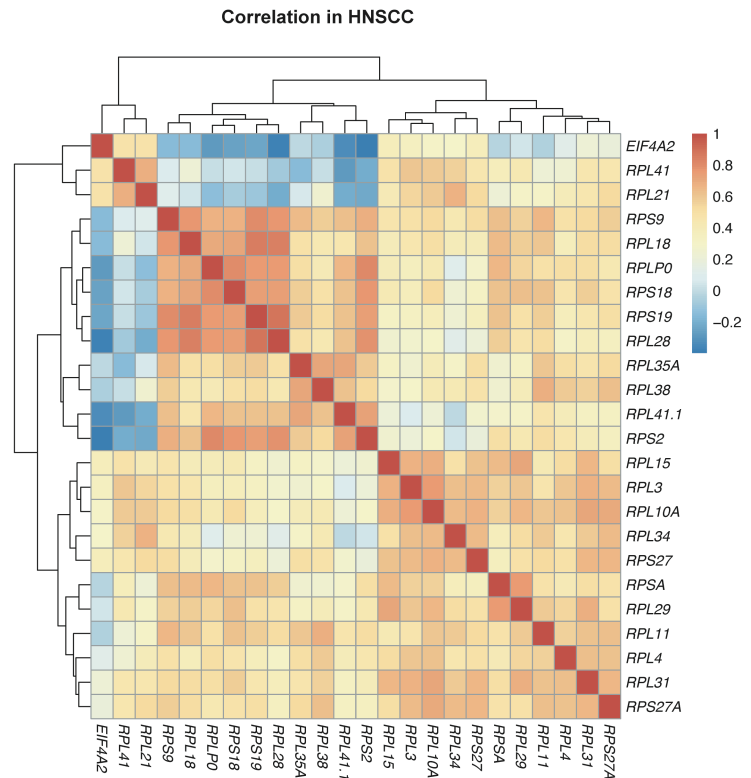

**C**

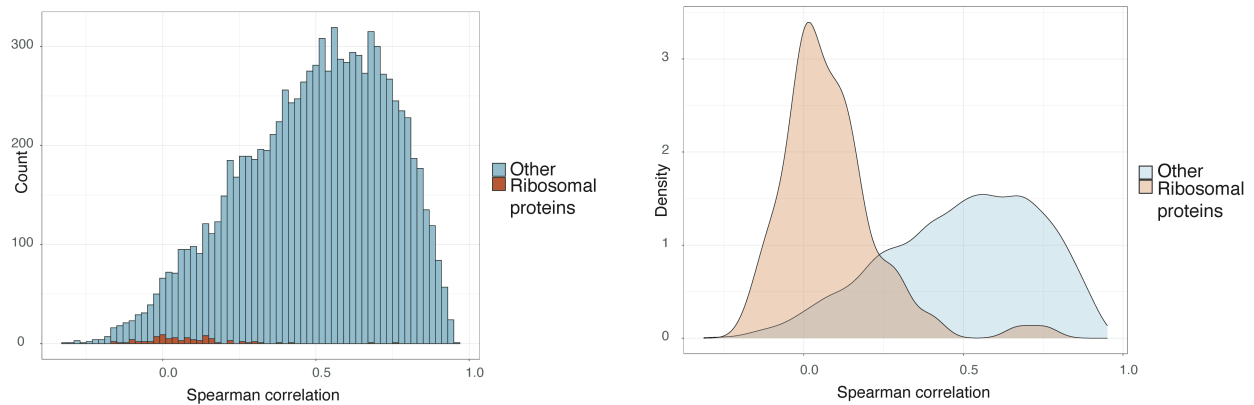

**D**

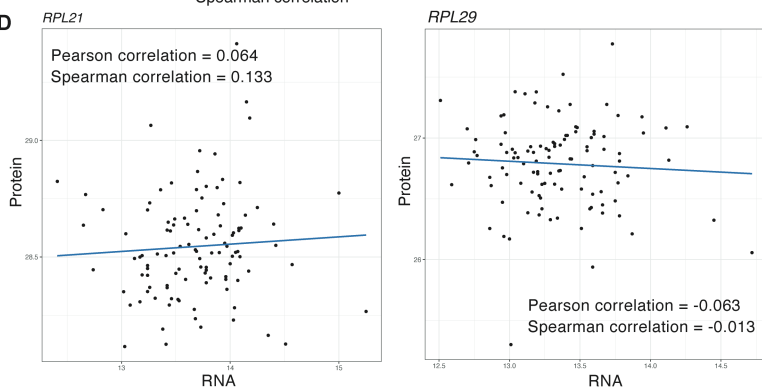

**E** Parallel coordinate plots for TOP and PRTE scores

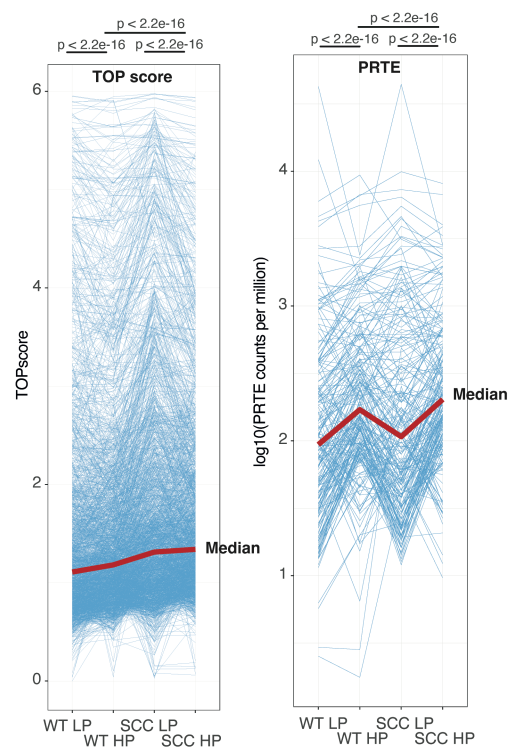

# Supplementary Figure 3

**A**

## RPL21 levels and survival in human cancer

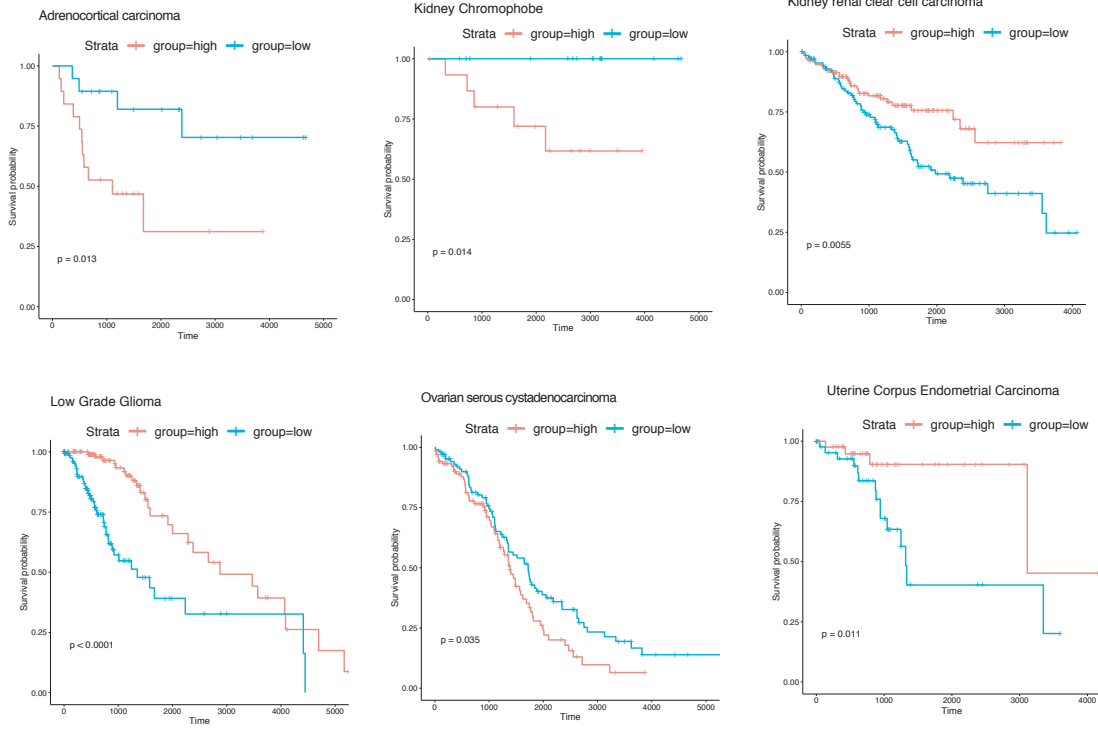

**B**

## RPL29 levels and survival in human cancer

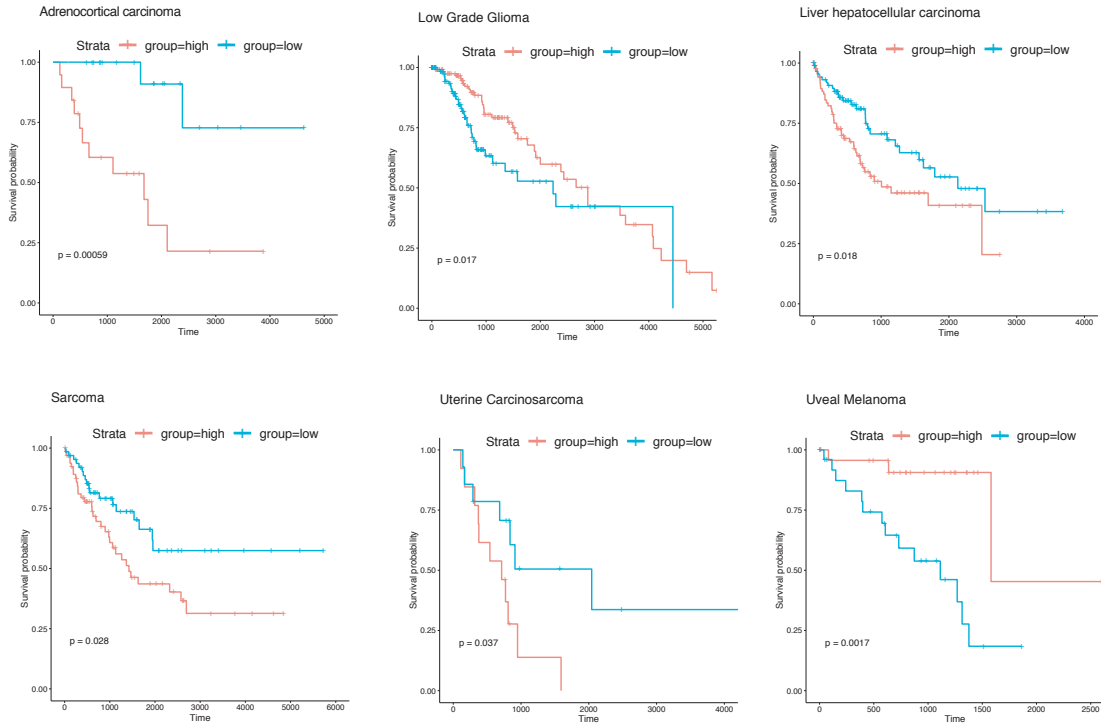

# Supplementary Figure 4

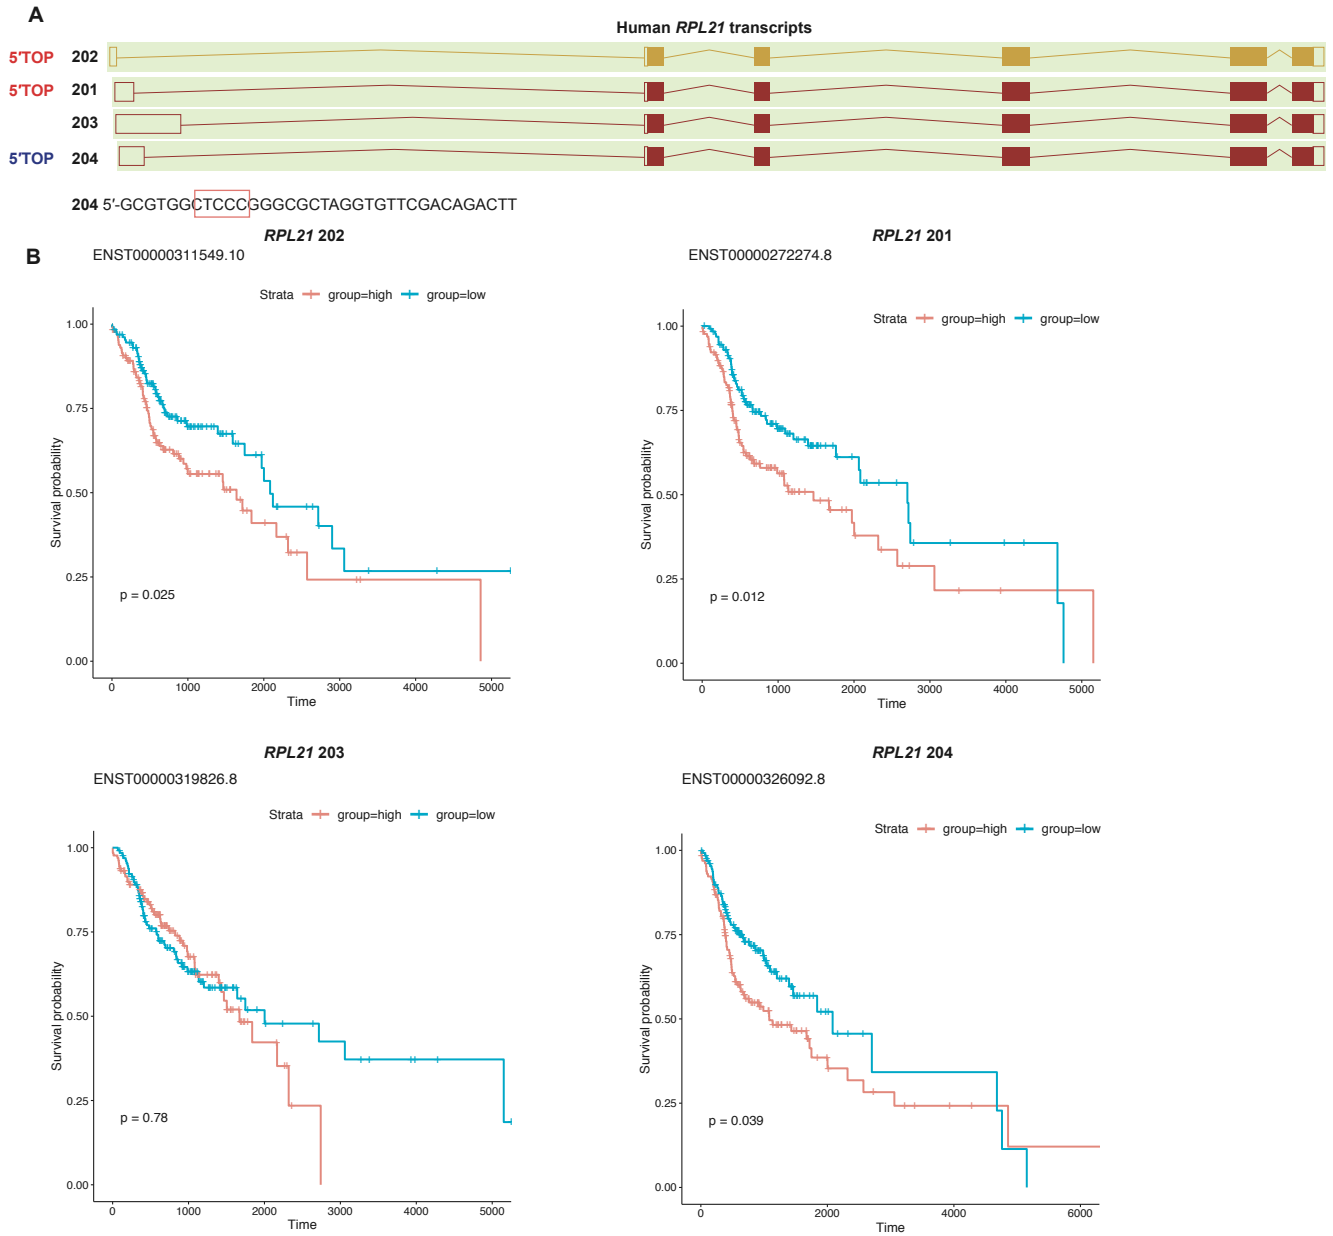

Supplement: 41388_2022_2578_MOESM1_ESM.pdf [file 41388_2022_2578_MOESM1_ESM.pdf]
